# Supplementary material for: Fabrication of carbon nanofibers with Si nanoparticle-stuffed cylindrical multi-channels via coaxial electrospinning and their anodic performance
Source: Royal Society of Chemistry journal article supplement (doi:10.1039/c4ra10031j), 2014-01-01
Supplement: c4ra10031j1.pdf [file c4ra10031j1.pdf]

## Supplementary Information to

# Fabrication of carbon nanofibers with Si nanoparticle-stuffed cylindrical multi-channels via coaxial electrospinning and their anodic performance

Ho-Sung Yang, Byoung-Sun Lee, Byeongchul You, Hun-Joon Sohn, and Woong-Ryeol Yu

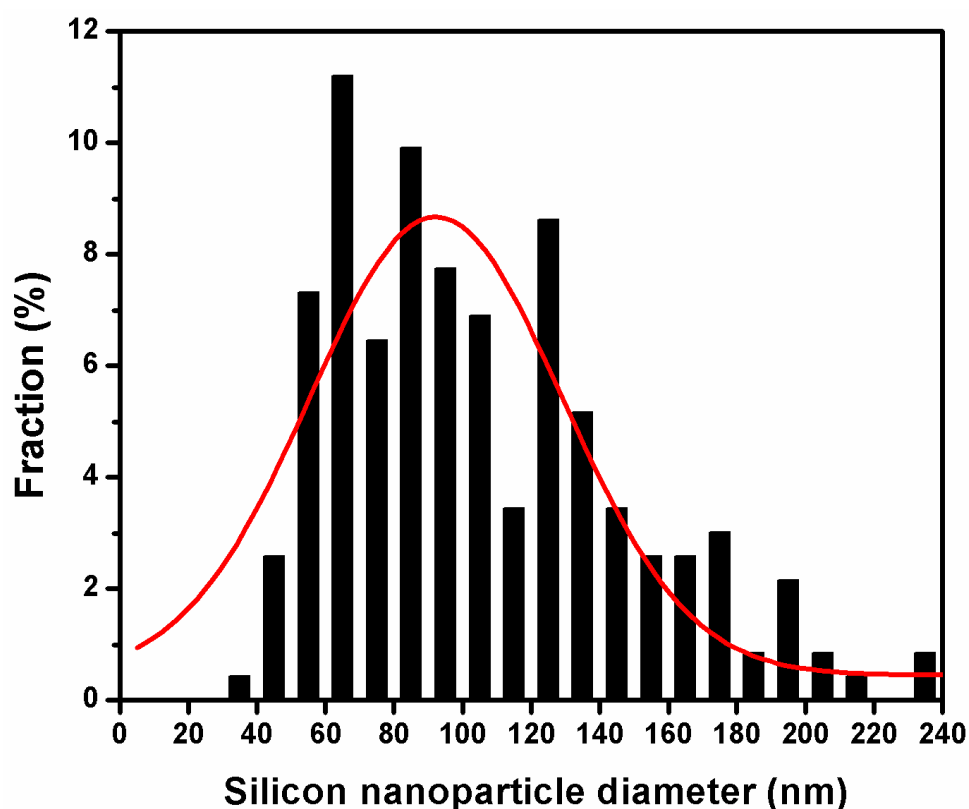

Figure S1. The diameter distribution of Si nanoparticles. Note that the distribution was fitted by Gaussian function as shown in red.

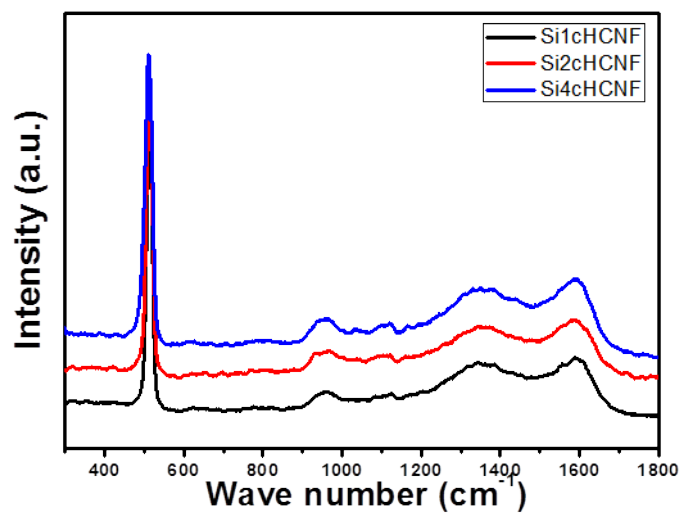

(a)

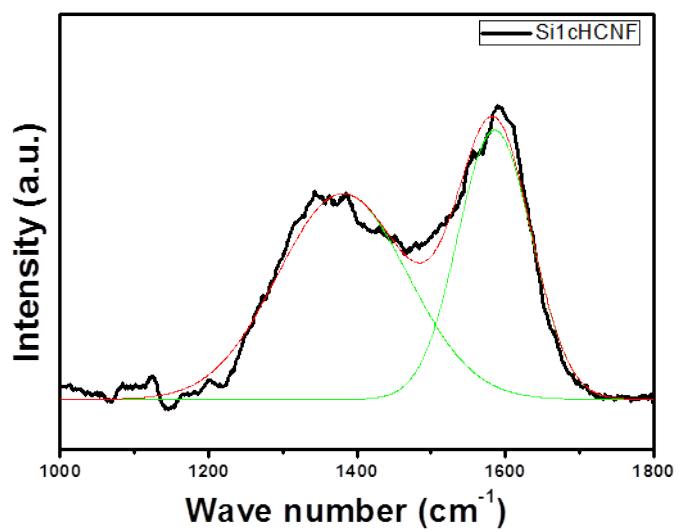

(b)

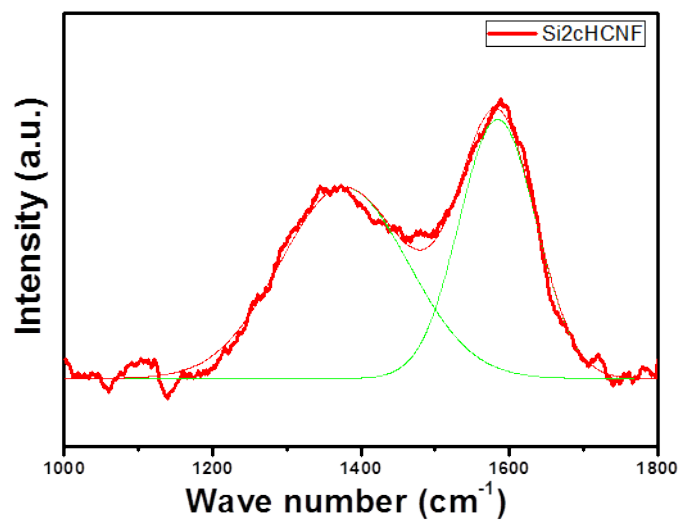

(c)

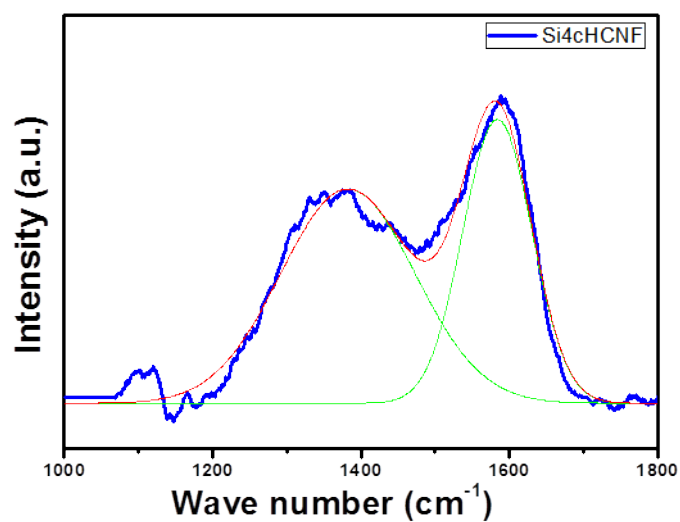

(d)

Figure S2. (a) Raman spectra of Si nanoparticle-encapsulated multi-channeled HCNFs (SimcHCNFs). Carbonaceous microstructure related Raman spectra (1000 to 1800 cm<sup>-1</sup>) of (b) Si1cHCNF, (c) Si2cHCNF, and (d) Si4cHCNF.

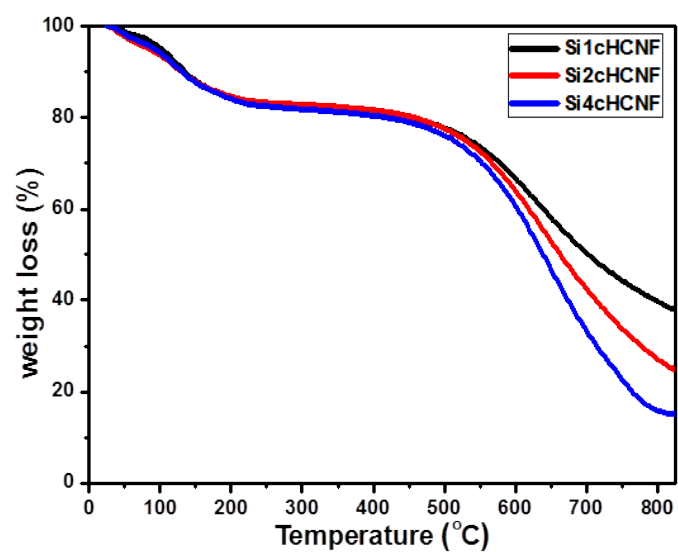

Figure S3. Thermogravimetric analysis (TGA) curves of Si-encapsulated multi-channelled HCNFs.

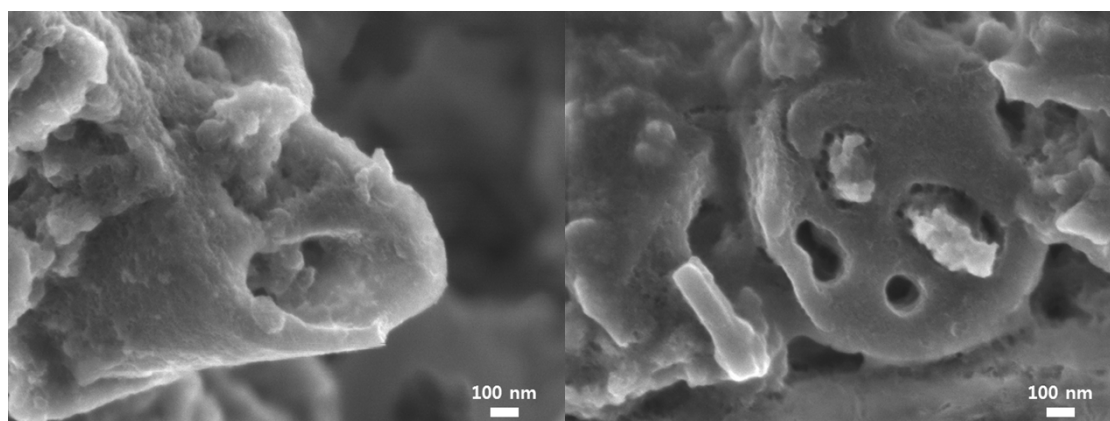

Figure S4. Cross-sectional FE-SEM images of (a) Si2cHCNF and (b) Si4cHCNF after 10 cycles.

Table S1.  $I_D/I_G$  ratio of Si nanoparticle-encapsulated multi-channelled HCNFs (SimcHCNFs).

| Sample          | Si1cHCNF | Si2cHCNF | Si4cHCNF |
|-----------------|----------|----------|----------|
| $I_D/I_G$ ratio | 0.76     | 0.74     | 0.75     |
